# Supplementary material for: Systemic combining inflammatory score (SCIS): a new score for prediction of oncologic outcomes in patients with high-risk non-muscle-invasive urothelial bladder cancer
Source: PubMed Central journal article supplement — Transl Androl Urol. 2021 Feb;10(2):626–35. doi: 10.21037/tau-20-1272 (PMC7947442; doi:10.21037/tau-20-1272), 2021-02
Supplement: tau-10-02-626-dss.pdf [file tau-10-02-626-dss.pdf]

## Data Sharing Statement

|                     |                                                                                                                                                     |                                                                                                     |
|---------------------|-----------------------------------------------------------------------------------------------------------------------------------------------------|-----------------------------------------------------------------------------------------------------|
| <b>Article Info</b> | http://dx.doi.org/10.21037/tau-20-1272                                                                                                              |                                                                                                     |
| <b>Item</b>         | <b>Question</b>                                                                                                                                     | <b>Authors' Response<br/>(place "-" if not applicable)</b>                                          |
| 1                   | Would you like to share data collected for your study to others?                                                                                    | Y                                                                                                   |
| 2                   | If not, would you like to share the reason for your decision?                                                                                       |                                                                                                     |
| 3                   | What data in particular will be shared?                                                                                                             | Dataset                                                                                             |
| 4                   | Any other documents will be shared? Such as study protocol, statistical analysis plan, informed consent form, clinical study report, analytic code. | No                                                                                                  |
| 5                   | When will data availability begin?                                                                                                                  | After publication                                                                                   |
| 6                   | When will data availability end?                                                                                                                    | One year within the publication date, since the technique or survival date may be updated over time |
| 7                   | To whom will you share the data?                                                                                                                    | Urologist                                                                                           |
| 8                   | For what type of analysis or purpose?                                                                                                               | To externally validate our findings                                                                 |
| 9                   | How or where can the data/documents be obtained?                                                                                                    | Emails could be sent to the address below to obtain the shared data:<br>giorgioivan1987@gmail.com.  |
| 10                  | Any other restrictions?                                                                                                                             | No                                                                                                  |
